# Supplementary material for: Association of polymorphic variants in GEMIN genes with the risk of depression in a Polish population
Source: PeerJ. 2022 Nov 15;10:e14317. doi: 10.7717/peerj.14317 (PMC9673762; doi:10.7717/peerj.14317)
Supplement: Supplemental Information 1 — Codebook: 0—control; 1—depression [file peerj-10-14317-s001.xlsx]

## Sheet: Arkusz1
Status	rs3744741	rs7813	rs197388
0	T/C	G/A	A/A
0	C/C	G/A	A/A
0	C/C	A/A	A/A
0	C/C	A/A	A/A
0	C/C	G/A	A/A
0	C/C	G/G	A/A
0	C/C	G/G	T/T
0	T/C	G/A	A/A
0	C/C	G/A	A/A
0	T/C	G/A	A/A
0	T/C	G/A	T/T
0	T/C	G/A	T/T
0	C/C	A/A	T/T
0	T/C	G/A	A/T
0	C/C	G/A	A/A
0	C/C	A/A	A/A
0	C/C	G/A	T/T
0	C/C	G/A	A/A
0	T/C	G/A	T/T
0	C/C	G/A	T/T
0	T/C	G/A	T/T
0	C/C	G/G	A/A
0	C/C	A/A	A/A
0	C/C	G/A	A/A
0	C/C	G/A	A/A
0	C/C	G/A	A/A
0	T/C	G/G	A/A
0	C/C	G/G	A/A
0	T/C	G/G	A/A
0	C/C	G/A	A/A
0	C/C	A/A	T/T
0	C/C	G/G	A/A
0	C/C	G/A	T/T
0	C/C	A/A	T/T
0	C/C	G/G	A/T
0	C/C	G/A	T/T
0	C/C	G/A	A/A
0	C/C	G/G	T/T
0	C/C	G/G	T/T
0	T/T	G/A	A/T
0	T/T	G/A	T/T
0	T/T	G/A	A/T
0	T/T	A/A	A/A
0	C/C	A/A	T/T
0	T/T	G/A	T/T
0	C/C	G/A	T/T
0	T/T	G/G	A/T
0	C/C	A/A	T/T
0	T/T	G/A	T/T
0	C/C	G/A	A/T
0	T/T	G/A	T/T
0	T/T	G/A	A/T
0	C/C	A/A	A/T
0	T/T	G/A	A/T
0	T/T	A/A	T/T
0	T/T	A/A	A/A
0	C/C	G/G	T/T
0	T/T	G/G	T/T
0	C/C	G/A	A/T
0	T/T	G/A	T/T
0	T/T	G/A	T/T
0	T/T	A/A	T/T
0	C/C	G/A	T/T
0	T/T	G/A	T/T
0	C/C	A/A	T/T
0	C/C	A/A	A/A
0	C/C	G/A	T/T
0	T/C	G/A	T/T
0	C/C	G/A	A/T
0	C/C	G/A	A/T
0	C/C	G/A	T/T
0	C/C	G/A	A/T
0	C/C	G/G	T/T
0	C/C	G/A	A/T
0	T/C	G/A	A/T
0	T/C	G/G	T/T
0	C/C	G/A	A/T
0	C/C	A/A	A/A
0	C/C	G/A	A/T
0	C/C	G/A	T/T
0	C/C	G/G	T/T
0	T/T	G/G	T/T
0	T/C	G/A	T/T
0	C/C	G/A	A/T
0	T/C	G/A	T/T
0	T/C	G/A	T/T
0	T/C	G/A	A/T
0	C/C	G/A	T/T
0	T/C	G/A	A/T
0	C/C	G/A	T/T
0	C/C	G/A	A/T
0	C/C	G/A	A/T
0	C/C	G/A	T/T
0	T/C	G/A	T/T
0	C/C	G/A	T/T
0	T/C	G/A	T/T
0	T/T	G/G	T/T
0	C/C	G/A	T/T
0	C/C	G/A	T/T
0	C/C	G/G	A/T
0	T/C	G/G	T/T
0	C/C	G/A	T/T
0	C/C	G/A	A/T
0	C/C	G/G	T/T
0	C/C	G/A	T/T
0	C/C	G/A	A/T
0	C/C	G/A	A/T
0	C/C	G/G	A/T
0	C/C	G/A	T/T
0	C/C	G/A	A/T
0	C/C	G/A	T/T
0	C/C	G/A	T/T
0	C/C	G/G	A/T
0	C/C	G/A	T/T
0	T/C	G/A	T/T
0	T/C	G/G	T/T
1	C/C	A/A	A/A
1	C/C	A/A	A/A
1	T/C	G/A	A/A
1	C/C	G/G	T/T
1	C/C	G/A	T/T
1	C/C	A/A	A/A
1	C/C	G/A	A/A
1	T/T	G/G	A/A
1	C/C	G/G	A/A
1	C/C	G/A	A/A
1	C/C	G/A	A/A
1	C/C	G/A	A/A
1	C/C	A/A	A/A
1	C/C	A/A	A/A
1	C/C	G/A	A/T
1	C/C	G/G	A/A
1	C/C	A/A	A/A
1	C/C	G/A	A/A
1	C/C	G/A	A/A
1	C/C	G/A	T/T
1	T/C	G/A	A/A
1	C/C	A/A	A/A
1	C/C	A/A	A/A
1	C/C	G/A	A/A
1	C/C	G/G	T/T
1	C/C	G/G	A/A
1	T/C	G/G	T/T
1	T/T	G/G	A/A
1	T/C	G/A	A/A
1	C/C	G/A	A/A
1	C/C	G/A	A/A
1	C/C	G/A	A/A
1	T/C	G/G	A/A
1	C/C	A/A	A/T
1	C/C	G/A	T/T
1	C/C	A/A	T/T
1	C/C	A/A	A/A
1	C/C	G/G	T/T
1	C/C	A/A	T/T
1	C/C	G/A	T/T
1	T/C	G/G	T/T
1	C/C	A/A	A/A
1	T/T	G/G	A/A
1	T/T	G/G	A/A
1	C/C	G/A	T/T
1	T/C	G/A	A/A
1	C/C	G/G	T/T
1	C/C	G/G	T/T
1	C/C	G/G	A/A
1	T/C	A/A	T/T
1	C/C	G/G	T/T
1	C/C	A/A	T/T
1	C/C	G/A	A/A
1	C/C	A/A	T/T
1	C/C	G/A	A/A
1	T/C	A/A	A/A
1	T/C	A/A	T/T
1	C/C	A/A	T/T
1	C/C	G/G	T/T
1	T/T	G/G	T/T
1	T/T	G/A	A/T
1	T/T	A/A	T/T
1	T/T	A/A	A/T
1	T/T	G/G	T/T
1	C/C	G/A	A/A
1	T/T	G/G	T/T
1	C/C	G/G	T/T
1	T/T	G/G	T/T
1	T/T	G/G	T/T
1	T/T	A/A	A/T
1	T/T	G/A	T/T
1	T/T	G/A	A/T
1	T/T	A/A	T/T
1	T/T	G/G	T/T
1	T/T	G/G	A/T
1	C/C	G/A	T/T
1	T/T	A/A	T/T
1	C/C	A/A	T/T
1	C/C	A/A	T/T
1	C/C	G/A	A/T
1	C/C	G/A	T/T
1	C/C	G/A	A/T
1	C/C	G/A	T/T
1	C/C	A/A	T/T
1	T/T	G/G	A/T
1	C/C	G/A	T/T
1	C/C	G/A	T/T
1	T/T	G/A	A/T
1	T/T	G/G	A/T
1	T/T	A/A	A/T
1	T/T	G/A	T/T
1	C/C	G/A	A/T
1	T/T	A/A	A/T
1	T/T	G/A	T/T
1	T/T	G/G	A/A
1	T/C	G/G	A/T
1	T/T	G/A	A/T
1	T/T	G/A	T/T
1	T/T	A/A	T/T
1	C/C	A/A	T/T
1	T/T	A/A	T/T
1	C/C	G/A	T/T
